# Supplementary material for: Magnetic fraction of the atmospheric dust in Kraków – physicochemical characteristics and possible environmental impact
Source: Copernicus journal article supplement (doi:10.5194/acp-23-1449-2023), 2023-01-26
Supplement: Supplementary file 1 [file acp-23-1449-2023-supplement.zip]

Archive with 3 entries (3 files):
- Supplement A.pdf
- Supplement B.pdf
- acp-23-1449-2023-supplement-title-page.pdf
