# Supplementary material for: Magnetic fraction of the atmospheric dust in Kraków – physicochemical characteristics and possible environmental impact
Source: Copernicus journal article supplement (doi:10.5194/acp-23-1449-2023), 2023-01-26
Supplement: Supplementary file 1 [file acp-23-1449-2023-supplement.zip › acp-23-1449-2023-supplement-title-page.pdf]

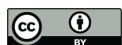

*Supplement of*

## **Magnetic fraction of the atmospheric dust in Kraków – physicochemical characteristics and possible environmental impact**

**Jan M. Michalik et al.**

*Correspondence to:* Jan M. Michalik ([jmichali@agh.edu.pl](mailto:jmichali@agh.edu.pl))

- [acp-23-1449-2023-supplement-title-page.pdf](#)
- [Supplement A.pdf](#)
- [Supplement B.pdf](#)

The copyright of individual parts of the supplement might differ from the article licence.
