# Supplementary material for: Magnetic fraction of the atmospheric dust in Kraków – physicochemical characteristics and possible environmental impact
Source: Copernicus journal article supplement (doi:10.5194/acp-23-1449-2023), 2023-01-26
Supplement: Supplementary file 1 [file acp-23-1449-2023-supplement.zip › Supplement B.pdf]

SUPPLEMENTARY INFORMATION II

Table S1. Results of EDS chemical analysis (wt%) of Fe containing particles of different size fractions. S – spherical particles, I – irregular particles, empty cells – element not determined

| >10 μm       |       |       |      |       |      |      |      |      |      |    |    |       |    |      |    |      |       |       |      |       |       |       |      |      |       |      |
|--------------|-------|-------|------|-------|------|------|------|------|------|----|----|-------|----|------|----|------|-------|-------|------|-------|-------|-------|------|------|-------|------|
| Analysis no. | shape | Fe    | Mn   | Cr    | Ni   | Zn   | V    | W    | Cu   | Sn | Sb | Pb    | Au | Ba   | Zr | Ti   | Si    | Al    | P    | O     | S     | Ca    | Mg   | K    | Na    | Cl   |
| M-05(1)      | I     | 68.34 | 5.74 | 12.44 | 6.33 |      |      |      |      |    |    |       |    |      |    |      | 3.34  | 0.22  |      | 2.72  | 0.49  | 0.38  |      |      |       |      |
| M-05(4)      | I     | 81.41 |      |       |      |      |      |      |      |    |    |       |    |      |    |      | 1.32  | 0.36  |      | 14.21 | 0.46  | 1.15  | 0.35 |      |       | 0.74 |
| M-06(7)      | I     | 51.96 | 0.52 |       |      | 1.36 |      |      | 1.60 |    |    |       |    | 1.01 |    |      | 9.94  | 4.72  |      | 20.38 | 1.84  | 4.31  | 1.19 | 0.59 |       | 0.58 |
| M-16(1)      | I     | 88.89 |      | 3.72  |      |      | 0.76 | 5.45 |      |    |    |       |    |      |    |      |       | 0.36  |      | 0.52  |       | 0.30  |      |      |       |      |
| M-16(3)      | I     | 62.89 |      | 2.26  |      |      |      |      |      |    |    |       |    | 3.32 |    |      | 2.31  | 0.52  |      | 10.15 | 6.54  | 8.97  | 1.02 | 0.29 |       | 1.73 |
| M-17(3)      | I     | 7.25  | 0.37 |       |      |      |      |      | 0.72 |    |    |       |    |      |    | 0.32 | 22.44 | 11.35 |      | 37.9  | 4.05  | 9.18  | 1.77 | 1.67 | 1.57  | 1.41 |
| M-36(6)      | I     | 19.93 |      |       |      |      |      |      |      |    |    |       |    |      |    |      | 8.88  | 2.36  | 0.72 | 31.58 | 3.77  | 11.24 | 3.1  | 1.26 | 12.61 | 4.55 |
| M-40(1)      | I     | 65.03 | 0.83 |       |      |      |      |      | 7.52 |    |    |       |    | 3.14 |    |      | 3.48  | 3.52  | 0.18 | 5.79  | 3.95  | 4.14  | 2.42 |      |       |      |
| M-49(2)      | I     | 98.18 |      |       |      |      |      |      |      |    |    |       |    |      |    |      | 0.50  |       |      | 0.82  |       | 0.34  |      |      | 0.16  |      |
| M-49(3)      | I     | 9.96  | 1.53 |       |      |      |      |      | 0.90 |    |    |       |    |      |    |      | 13.79 | 0.78  | 2.94 | 14.7  | 3.33  | 48.63 | 0.99 | 0.74 |       | 1.71 |
| M-51(5)      | I     | 8.04  |      |       |      |      |      |      |      |    |    |       |    |      |    | 0.16 | 34.17 | 5.78  |      | 38.34 | 2.06  | 5.27  | 2.85 | 1.26 | 1.41  | 0.66 |
| M-63(1)      | S     | 90.41 | 0.73 |       |      |      |      |      |      |    |    |       |    |      |    |      | 0.5   |       |      | 8.14  |       | 0.22  |      |      |       |      |
| M-64(1)      | S     | 40.01 | 2.89 |       |      | 1.47 |      |      |      |    |    |       |    |      |    | 0.70 | 2.32  | 1.95  | 0.13 | 14.37 | 0.15  | 35.57 | 0.31 |      |       | 0.13 |
| M-66(1)      | I     | 91.33 | 0.46 |       |      |      |      |      |      |    |    |       |    |      |    |      | 0.56  |       |      | 7.12  |       | 0.53  |      |      |       |      |
| M-68(1)      | I     | 15.62 |      |       |      |      |      |      |      |    |    |       |    |      |    | 0.30 | 23.37 | 5.32  | 0.45 | 34.7  | 5.84  | 5.27  | 4.37 | 1.21 | 1.87  | 1.68 |
| M-68(3)      | I     | 85.47 | 0.81 |       |      |      |      |      | 1.67 |    |    |       |    |      |    |      | 3.18  |       |      | 7.2   | 0.44  | 0.39  | 0.36 |      |       | 0.48 |
| M-69(4)      | I     | 30.06 |      |       |      |      |      |      |      |    |    | 10.10 |    |      |    |      | 30.05 | 1.31  |      | 16.4  |       | 7.89  | 0.98 | 0.45 | 0.76  | 2    |
| M-70(1)      | I     | 87.93 |      | 11.18 |      |      |      |      |      |    |    |       |    |      |    |      | 0.54  |       |      | 0.1   | 0.35  |       |      |      |       |      |
| M-71(4)      | I     | 81.45 | 1.00 |       |      |      |      |      |      |    |    |       |    |      |    |      | 10.52 | 0.43  |      | 3.48  | 0.6   | 1.26  |      |      | 0.61  | 0.65 |
| M-74(2)      | I     | 61.01 |      |       |      |      |      |      |      |    |    |       |    |      |    |      | 20.32 | 0.45  |      | 14.74 | 0.49  | 1.35  |      |      | 0.68  | 0.96 |
| M-75(2)      | I     | 83.98 |      |       |      |      |      |      |      |    |    |       |    |      |    |      | 1.50  | 0.61  |      | 10.21 | 0.29  | 1.91  | 0.4  |      | 1.10  |      |
| M-121(1)     | I     | 83.24 |      |       |      |      |      |      |      |    |    |       |    |      |    |      | 1.26  | 0.76  |      | 13.14 |       | 0.45  | 1.15 |      |       |      |
| M-121(2)     | I     | 66.4  |      |       |      |      |      |      |      |    |    |       |    |      |    |      | 8.88  | 0.92  |      | 8.14  | 1.48  | 14.02 | 0.16 |      |       |      |
| M-121(3)     | I     | 96.49 |      |       |      |      |      |      |      |    |    |       |    |      |    |      | 0.35  |       | 0.02 | 2.53  |       | 0.21  | 0.4  |      |       |      |
| M-123(4)     | I     | 88.34 |      |       |      |      |      |      |      |    |    |       |    |      |    |      | 1.25  | 0.32  | 0.47 | 7.73  | 0.29  | 0.46  |      |      | 0.76  | 0.38 |
| M-135(6)     | I     | 17.18 |      |       |      |      |      |      | 0.72 |    |    |       |    |      |    | 0.94 | 33.26 | 14.59 | 0.77 | 21.19 | 1.62  | 3.03  | 1.50 | 3.57 | 0.51  | 1.12 |
| M-135(7)     | I     | 28.78 |      |       |      |      |      |      |      |    |    |       |    |      |    | 0.69 | 30.81 | 7.65  |      | 16.81 | 3.18  | 6.33  | 1.33 | 1.64 | 1.07  | 1.71 |
| M-135(8)     | I     | 10.49 |      |       |      |      |      |      |      |    |    |       |    |      |    | 0.50 | 18.16 | 7.90  | 0.30 | 27.06 | 13.86 | 16.78 | 0.89 | 2.61 |       | 1.45 |
| M-143(3)     | I     | 13.53 |      |       |      |      |      |      |      |    |    |       |    |      |    | 0.32 | 39.45 | 13.29 |      | 17.87 | 2.15  | 4.56  | 1.55 | 5.07 |       | 2.21 |
| M-151(1)     | S     | 98.55 |      |       |      |      |      |      |      |    |    |       |    |      |    |      | 0.38  |       |      | 0.34  | 0.47  | 0.26  |      |      |       |      |
| M-155(2)     | I     | 92.19 | 0.53 |       |      |      |      |      |      |    |    |       |    |      |    |      | 2.53  |       |      | 3.3   | 1     | 0.45  |      |      |       |      |
| M-158(1)     | I     | 94.89 | 0.42 | 0.33  |      |      |      |      |      |    |    |       |    |      |    |      | 2.32  | 0.97  |      | 1.07  |       |       |      |      |       |      |
| M-158(2)     | I     | 97.46 | 0.65 |       |      |      |      |      |      |    |    |       |    |      |    |      |       |       |      | 1.89  |       |       |      |      |       |      |
| M-159(1)     | I     | 97.75 | 1.28 |       |      |      |      |      |      |    |    |       |    |      |    |      | 0.70  |       |      | 0.27  |       |       |      |      |       |      |

| 10-5 μm      |       |       |      |      |    |      |   |      |      |    |    |       |    |      |    |      |       |       |       |       |       |       |      |       |      |      |
|--------------|-------|-------|------|------|----|------|---|------|------|----|----|-------|----|------|----|------|-------|-------|-------|-------|-------|-------|------|-------|------|------|
| Analysis no. | shape | Fe    | Mn   | Cr   | Ni | Zn   | V | W    | Cu   | Sn | Sb | Pb    | Au | Ba   | Zr | Ti   | Si    | Al    | P     | O     | S     | Ca    | Mg   | K     | Na   | Cl   |
| M-02(1)      | S     | 4.85  |      |      |    |      |   |      |      |    |    |       |    |      |    | 1.07 | 35.37 | 18.6  |       | 31.23 |       | 0.54  | 1.79 | 5     | 1.55 |      |
| M-02(2)      | S     | 87.55 |      |      |    |      |   |      |      |    |    |       |    |      |    |      | 0.26  |       | 0.13  | 12.06 |       |       |      |       |      |      |
| M-05(2)      | I     | 90.22 |      | 0.22 |    |      |   |      |      |    |    |       |    |      |    |      | 3.58  |       |       | 5.40  | 0.58  |       |      |       |      |      |
| M-06(6)      | I     | 80.85 | 0.98 |      |    |      |   |      |      |    |    |       |    |      |    |      | 0.92  |       |       | 14.68 | 1.18  |       |      |       | 1.39 |      |
| M-06(9)      | I     | 73.74 |      |      |    |      |   |      |      |    |    |       |    |      |    |      | 7.61  | 0.94  |       | 10.49 | 1.07  | 3.52  | 0.92 | 0.29  | 0.75 | 0.67 |
| M-07(4)      | I     | 76.74 |      | 0.4  |    | 0.86 |   |      |      |    |    |       |    | 1.93 |    |      | 2.96  | 0.63  | 11.53 | 0.10  | 1.40  | 0.80  | 1.09 | 0.22  | 1.15 | 0.29 |
| M-51(1)      | I     | 90.03 | 1.26 |      |    | 1.01 |   |      |      |    |    |       |    |      |    | 0.13 | 1.61  | 0.26  |       | 0.70  | 1.18  | 2.93  |      | 0.16  |      | 0.73 |
| M-51(6)      | I     | 5.14  |      |      |    |      |   |      |      |    |    |       |    |      |    |      | 42.25 | 10.65 |       | 13.15 | 0.66  |       |      | 27.92 | 0.23 |      |
| M-55(1)      | S     | 77.47 |      |      |    |      |   |      |      |    |    |       |    |      |    |      | 0.16  |       |       | 22.37 |       |       |      |       |      |      |
| M-56(1)      | S     | 75.99 |      |      |    |      |   |      |      |    |    |       |    |      |    |      | 0.45  |       |       | 22.68 |       | 0.24  | 0.24 |       | 0.40 |      |
| M-67(1)      | I     | 3.74  |      |      |    |      |   | 2.31 |      |    |    | 70.25 |    |      |    |      |       |       |       | 11.89 | 10.32 | 1.49  |      |       |      |      |
| M-68(2)      | I     | 94.15 | 0.81 | 0.14 |    |      |   |      | 0.74 |    |    |       |    |      |    |      | 3.38  |       |       | 0.10  | 0.21  | 0.36  | 0.21 |       |      |      |
| M-71(1)      | I     | 95.65 | 1.12 |      |    |      |   |      |      |    |    |       |    |      |    |      | 2.10  | 0.17  |       | 0.96  |       |       |      |       |      |      |
| M-85(3)      | I     | 17.45 |      |      |    |      |   |      |      |    |    |       |    | 0.92 |    |      | 21.44 | 8.09  | 0.74  | 31.93 | 2.64  | 10.29 | 1.78 | 1.97  | 1.78 | 0.97 |
| M-103(1)     | S     | 88.96 | 1.56 |      |    |      |   |      |      |    |    |       |    |      |    |      | 0.64  |       |       | 8.61  |       | 0.23  |      |       |      |      |
| M-122(4)     | S     | 69.42 |      |      |    |      |   |      |      |    |    |       |    |      |    |      | 14.11 | 1.97  | 0.17  | 12.83 | 0.16  | 0.15  |      | 0.18  | 1.01 |      |
| M-135(4)     | I     | 69.51 | 0.63 |      |    |      |   |      |      |    |    |       |    | 5.91 |    |      | 4.74  | 0.80  |       | 13.55 | 3.90  | 0.62  | 0.34 |       |      |      |
| M-135(5)     | I     | 62.95 | 0.59 |      |    |      |   |      | 0.39 |    |    |       |    | 0.61 |    |      | 5.27  | 0.73  |       | 16.8  | 4.54  | 5.38  | 1.08 | 0.20  | 0.63 | 0.83 |
| M-138(3)     | I     | 30.05 | 0.28 |      |    | 0.90 |   |      | 0.27 |    |    |       |    |      |    |      | 26.22 | 4.40  |       | 32.16 | 1.27  | 1.35  | 0.28 | 1.52  |      | 1.30 |
| M-145(3)     | I     | 93.32 |      |      |    |      |   |      |      |    |    |       |    |      |    |      | 0.56  |       |       | 6.12  |       |       |      |       |      |      |
| M-149(1)     | S     | 88.56 |      |      |    |      |   |      |      |    |    |       |    |      |    |      | 0.77  |       |       | 10.67 |       |       |      |       |      |      |
| M-155(3)     | S     | 89.92 | 0.65 |      |    | 1.83 |   |      |      |    |    |       |    |      |    |      | 0.44  |       |       | 7.16  |       |       |      |       |      |      |

| 5-2.5 μm     |       |       |      |       |    |      |   |   |      |    |    |    |    |      |    |      |       |       |      |       |      |       |      |      |      |       |
|--------------|-------|-------|------|-------|----|------|---|---|------|----|----|----|----|------|----|------|-------|-------|------|-------|------|-------|------|------|------|-------|
| Analysis no. | shape | Fe    | Mn   | Cr    | Ni | Zn   | V | W | Cu   | Sn | Sb | Pb | Au | Ba   | Zr | Ti   | Si    | Al    | P    | O     | S    | Ca    | Mg   | K    | Na   | Cl    |
| M-05(3)      | I     | 56.05 | 0.76 |       |    |      |   |   |      |    |    |    |    |      |    |      | 12.65 | 2.26  |      | 21.61 | 0.51 | 2.49  | 1.24 | 0.57 | 1.29 | 0.57  |
| M-06(3)      | I     | 85.05 |      |       |    |      |   |   |      |    |    |    |    | 1.73 |    |      | 2.15  | 0.32  |      | 7.23  | 2.08 |       | 1.44 |      |      |       |
| M-07(1)      | I     | 92.36 | 0.81 |       |    |      |   |   |      |    |    |    |    |      |    |      | 2.85  |       |      | 3.05  | 0.62 | 0.31  |      |      |      |       |
| M-51(2)      | I     | 24.24 | 0.48 |       |    |      |   |   |      |    |    |    |    |      |    | 0.20 | 12.94 | 4.68  |      | 35.19 | 2.20 | 11.32 | 6.75 | 1.12 |      | 0.88  |
| M-51(3)      | I     | 58.62 | 0.32 |       |    | 1.71 |   |   |      |    |    |    |    |      |    |      | 8.09  | 2.84  | 0.36 | 17.80 | 1.33 | 5.20  | 0.56 | 1.53 |      | 1.64  |
| M-51(4)      | I     | 55.70 |      |       |    | 1.91 |   |   |      |    |    |    |    |      |    | 0.44 | 10.16 | 2.32  |      | 0.10  | 6.62 | 20.39 | 0.22 | 1.19 |      | 1.05  |
| M-53(1)      | S     | 71.70 |      |       |    |      |   |   |      |    |    |    |    |      |    |      | 6.06  | 1.57  |      | 15.85 | 0.57 | 2.70  | 0.84 |      | 0.71 |       |
| M-56(2)      | S     | 77.40 |      |       |    |      |   |   |      |    |    |    |    |      |    |      | 0.20  |       |      | 22.40 |      |       |      |      |      |       |
| M-56(3)      | S     | 62.18 |      |       |    |      |   |   |      |    |    |    |    |      |    |      | 17.8  |       |      | 19.83 |      | 0.19  |      |      |      |       |
| M-68(4)      | I     | 75.44 |      |       |    |      |   |   |      |    |    |    |    |      |    |      | 1.83  | 1.96  |      | 14.84 | 1.63 | 2.38  | 0.81 | 0.17 | 0.67 | 0.27  |
| M-71(2)      | I     | 95.65 | 1.12 |       |    |      |   |   |      |    |    |    |    |      |    |      | 2.10  | 0.17  |      | 0.96  |      |       |      |      |      |       |
| M-71(3)      | I     | 66.33 | 0.90 |       |    | 0.49 |   |   | 1.30 |    |    |    |    | 1.11 |    | 0.12 | 5.41  | 0.75  | 0.13 | 16.83 | 1.37 | 3.76  |      |      | 0.92 | 0.58  |
| M-72(5)      | I     | 75.68 |      |       |    |      |   |   |      |    |    |    |    |      |    |      | 1.07  | 0.34  |      | 17.67 | 0.76 | 1.59  | 2.89 |      |      |       |
| M-75(1)      | S     | 83.74 | 1.32 |       |    |      |   |   |      |    |    |    |    |      |    |      | 1.21  |       |      | 13.73 |      |       |      |      |      |       |
| M-77(2)      | S     | 87.56 |      |       |    |      |   |   |      |    |    |    |    |      |    |      | 1.87  | 0.26  |      | 9.61  | 0.28 | 0.42  |      |      |      |       |
| M-81(1)      | I     | 70.12 | 0.87 |       |    |      |   |   |      |    |    |    |    |      |    |      | 14.8  | 0.60  | 0.63 | 8.54  | 1.30 | 1.04  |      | 0.19 | 1.33 | 0.58  |
| M-85(2)      | I     | 10.81 | 0.32 |       |    |      |   |   | 0.57 |    |    |    |    |      |    | 0.61 | 35.62 | 12.78 | 0.39 | 17.69 | 3.07 | 8.33  | 2.73 | 3.58 | 2.47 | 1.03  |
| M-89(1)      | I     | 78.88 | 0.78 |       |    |      |   |   |      |    |    |    |    | 0.48 |    |      | 2.27  | 0.50  | 0.52 | 11.24 | 1.11 | 2.40  | 0.62 |      | 0.67 | 0.53  |
| M-92(1)      | I     | 88.66 |      |       |    |      |   |   |      |    |    |    |    |      |    |      | 0.50  | 0.48  |      | 10.36 |      |       |      |      |      |       |
| M-103(6)     | I     | 11.11 |      |       |    |      |   |   |      |    |    |    |    |      |    |      | 25.82 | 6.85  |      | 35.23 | 3.77 | 8.57  | 4.85 | 1.76 | 0.92 | 1.12  |
| M-118(1)     | I     | 74.56 | 0.80 |       |    |      |   |   |      |    |    |    |    |      |    |      | 3.90  | 1.57  | 0.14 | 11.75 | 0.83 | 2.18  | 0.69 | 0.20 | 3.23 | 0.15  |
| M-118(6)     | I     | 39.33 | 0.35 | 28.61 |    |      |   |   |      |    |    |    |    |      |    | 0.58 | 10.2  | 8.93  |      | 5.46  | 1.21 | 1.35  | 3.09 | 0.89 |      |       |
| M-118(7)     | I     | 23.17 |      | 1.35  |    |      |   |   |      |    |    |    |    |      |    |      | 28.52 | 11.11 |      | 16.81 | 3.14 | 1.99  | 12.5 | 1.41 |      |       |
| M-118(8)     | I     | 39.72 |      | 1.53  |    |      |   |   |      |    |    |    |    |      |    |      | 39.86 | 1.07  |      | 11.51 | 2.32 | 2.63  | 0.53 |      |      | 0.83  |
| M-123(3)     | S     | 85.89 |      |       |    |      |   |   |      |    |    |    |    |      |    |      | 0.84  | 0.29  |      | 12.98 |      |       |      |      |      |       |
| M-135(1)     | I     | 79.46 | 0.34 |       |    |      |   |   |      |    |    |    |    |      |    |      | 2.71  | 1.09  |      | 14.61 | 0.38 | 0.54  | 0.50 | 0.14 |      | 0.23  |
| M-135(9)     | I     | 60.89 | 0.49 |       |    |      |   |   |      |    |    |    |    |      |    |      | 6.62  | 2.81  | 0.23 | 20.55 | 2.42 | 3.84  | 0.72 | 0.32 |      | 1.11  |
| M-135(10)    | I     | 84.25 | 0.82 |       |    |      |   |   |      |    |    |    |    |      |    |      | 5.89  | 1.40  |      | 2.63  | 0.93 | 2.77  | 0.19 | 0.26 | 0.46 | 0.40  |
| M-136(3)     | I     | 75.83 | 0.66 |       |    | 1.19 |   |   | 1.88 |    |    |    |    |      |    |      | 3.80  | 2.27  |      | 11.67 | 1.41 | 0.52  | 0.58 |      |      | 0.19  |
| M-136(5)     | I     | 93.99 | 0.55 |       |    |      |   |   |      |    |    |    |    |      |    |      | 2.13  | 0.09  | 1.14 | 1.88  | 0.22 |       |      |      |      |       |
| M-136(6)     | I     | 79.45 | 0.99 | 12.00 |    | 0.40 |   |   | 0.56 |    |    |    |    |      |    |      | 1.30  | 0.73  |      | 3.83  | 0.74 |       |      |      |      |       |
| M-138(1)     | I     | 89.06 | 0.54 |       |    |      |   |   |      |    |    |    |    |      |    |      | 3.25  |       | 0.98 | 4.97  | 0.40 | 0.54  |      |      |      | 0.26  |
| M-138(5)     | I     | 15.01 | 1.08 |       |    | 2.05 |   |   | 3.40 |    |    |    |    |      |    |      | 2.64  | 1.34  | 1.58 | 32.68 | 7.32 | 16.68 | 2.68 | 0.82 |      | 12.72 |
| M-144(1)     | S     | 84.99 |      |       |    |      |   |   |      |    |    |    |    | 0.19 |    |      | 0.86  | 0.25  |      | 12.14 | 0.85 | 0.61  |      | 0.11 |      |       |
| M-155(1)     | S     | 91.48 |      |       |    |      |   |   |      |    |    |    |    |      |    |      | 0.40  |       |      | 8.12  |      |       |      |      |      |       |

| 2.5-1.0 μm   |       |       |      |      |      |       |   |   |      |      |    |       |    |      |    |      |       |      |      |       |       |       |       |      |      |      |
|--------------|-------|-------|------|------|------|-------|---|---|------|------|----|-------|----|------|----|------|-------|------|------|-------|-------|-------|-------|------|------|------|
| Analysis no. | shape | Fe    | Mn   | Cr   | Ni   | Zn    | V | W | Cu   | Sn   | Sb | Pb    | Au | Ba   | Zr | Ti   | Si    | Al   | P    | O     | S     | Ca    | Mg    | K    | Na   | Cl   |
| M-05(5)      | S     | 86.06 |      |      |      | 0.75  |   |   |      |      |    |       |    |      |    |      | 0.53  |      |      | 12.39 |       | 0.27  |       |      |      |      |
| M-05(6)      | I     | 55.64 | 4.15 | 0.87 |      | 13.61 |   |   |      |      |    |       |    |      |    |      | 4.06  | 2.32 |      | 12.93 | 2.22  | 2.64  | 1.56  |      |      |      |
| M-05(7)      | I     | 44.85 | 8.56 | 1.26 | 1.08 | 19.78 |   |   |      |      |    |       |    |      |    | 0.16 | 2.78  | 0.97 |      | 12.70 | 1.19  | 3.37  | 2.91  |      |      | 0.39 |
| M-07(2)      | I     | 89.04 | 1.06 |      |      |       |   |   |      |      |    |       |    |      |    |      | 3.05  | 0.27 | 1.07 | 4.54  | 0.97  |       |       |      |      |      |
| M-07(3)      | S     | 85.33 |      |      |      |       |   |   |      |      |    |       |    |      |    |      | 0.51  |      | 0.31 | 12.87 | 0.27  |       |       |      | 0.71 |      |
| M-07(5)      | I     | 85.95 |      |      |      |       |   |   |      |      |    |       |    |      |    |      | 0.84  | 0.34 |      | 11.46 | 0.26  | 0.27  |       |      | 0.88 |      |
| M-07(6)      | I     | 82.46 |      |      |      |       |   |   | 1.84 |      |    |       |    |      |    |      | 3.38  | 1.05 |      | 6.54  | 1.35  | 0.73  | 0.76  |      | 1.21 | 0.68 |
| M-09(1)      | S     | 87.26 |      |      |      |       |   |   |      |      |    |       |    |      |    |      |       |      |      | 12.02 | 0.72  |       |       |      |      |      |
| M-17(1)      | I     | 46.21 |      |      |      |       |   |   |      |      |    |       |    |      |    |      | 8.65  | 5.43 |      | 28.75 | 3.25  | 4.79  | 1.10  | 0.49 | 0.98 | 0.35 |
| M-18(1)      | S     | 77.23 |      |      |      |       |   |   |      |      |    |       |    |      |    |      | 8.13  |      |      | 14.14 |       |       |       |      | 0.50 |      |
| M-19(1)      | S     | 55.65 | 1.25 |      |      | 20.8  |   |   |      |      |    |       |    |      |    |      | 4.36  | 1.03 |      | 12.19 | 0.49  | 3.80  | 0.43  |      |      |      |
| M-20(1)      | I     | 93.26 |      |      |      |       |   |   |      |      |    |       |    |      |    |      | 1.06  |      |      | 3.87  | 0.80  | 0.30  |       |      | 0.71 |      |
| M-20(2)      | I     | 86.13 | 0.58 |      |      |       |   |   | 0.31 |      |    |       |    | 1.03 |    |      | 1.76  | 0.41 | 0.29 | 4.99  | 2.01  | 0.80  | 0.36  |      | 1.33 |      |
| M-21(1)      | I     | 88.72 |      |      |      |       |   |   | 4.64 | 1.45 |    |       |    |      |    |      | 0.90  |      |      | 3.77  | 0.52  |       |       |      |      |      |
| M-21(5)      | I     | 78.13 |      |      |      |       |   |   |      |      |    |       |    |      |    |      | 3.83  | 0.84 |      | 10.55 | 1.81  | 2.31  | 0.96  |      | 1.57 |      |
| M-22(1)      | I     | 76.69 | 1.24 |      |      |       |   |   |      |      |    |       |    |      |    |      | 0.44  |      |      | 11.16 | 0.50  | 0.36  | 9.61  |      |      |      |
| M-22(2)      | I     | 56.47 | 5.31 | 0.4  |      |       |   |   |      |      |    |       |    |      |    |      | 0.48  |      | 0.27 | 13.41 | 1.29  | 0.55  | 21.82 |      |      |      |
| M-35(1)      | I     | 72.74 |      |      |      |       |   |   |      |      |    |       |    | 3.10 |    |      | 3.30  | 0.36 |      | 14.67 | 2.62  | 0.64  | 0.54  |      | 1.72 | 0.31 |
| M-35(2)      | I     | 69.09 |      | 0.42 |      |       |   |   |      |      |    |       |    | 0.87 |    |      | 4.80  | 0.81 | 0.30 | 15.65 | 1.39  | 2.14  | 2.27  |      | 1.91 | 0.35 |
| M-36(1)      | S     | 77.86 |      |      |      |       |   |   |      |      |    |       |    |      |    |      | 1.56  | 1    | 0.73 | 16.97 | 0.31  | 0.40  |       |      | 0.92 | 0.25 |
| M-36(2)      | S     | 77.94 |      |      |      |       |   |   |      |      |    |       |    |      |    |      | 2.22  | 0.62 |      | 16.72 | 0.55  | 0.59  |       |      | 1.36 |      |
| M-36(3)      | I     | 79.27 | 0.69 |      |      |       |   |   |      |      |    |       |    |      |    |      | 5.04  | 1.13 |      | 5.59  | 2.35  | 2.79  | 0.45  | 0.28 | 1.94 | 0.47 |
| M-36(5)      | I     | 67.27 |      |      |      |       |   |   |      |      |    |       |    |      |    |      | 5.58  | 1.17 |      | 18.22 | 1.45  | 2.18  | 0.54  | 0.37 | 2.52 | 0.70 |
| M-39(1)      | I     | 85.8  | 1.37 |      |      |       |   |   |      |      |    |       |    |      |    |      | 3.70  | 0.60 |      | 5.10  | 2.06  | 1.37  |       |      |      |      |
| M-42(1)      | I     | 79.33 | 0.96 |      |      |       |   |   |      |      |    |       |    |      |    |      | 2.43  |      |      | 12.33 | 1.97  | 0.74  |       |      | 2.24 |      |
| M-59(1)      | I     | 72.17 | 1.21 |      |      |       |   |   |      |      |    |       |    |      |    |      | 15.05 | 0.44 |      | 8.97  | 0.24  | 1.17  | 0.41  |      |      | 0.34 |
| M-60(1)      | I     | 82.06 | 0.99 | 0.3  |      |       |   |   |      |      |    |       |    |      |    |      | 2.74  | 0.43 |      | 2.65  | 0.79  | 7.98  | 1.15  |      |      | 0.91 |
| M-60(2)      | I     | 53.43 |      |      |      |       |   |   |      |      |    |       |    |      |    |      | 3.28  | 1.10 |      | 14.15 | 0.68  | 25.45 | 1.38  |      | 0.31 | 0.22 |
| M-69(3)      | I     | 30.11 |      |      |      |       |   |   |      |      |    | 26.57 |    |      |    |      | 9.24  | 2.88 |      | 14.17 |       | 5.79  | 0.68  | 2.60 | 0.75 | 7.21 |
| M-72(2)      | S     | 85.51 |      |      |      |       |   |   |      |      |    |       |    |      |    |      | 0.66  | 0.19 |      | 11.79 | 0.51  | 0.86  |       |      | 0.48 |      |
| M-72(4)      | I     | 85.14 |      |      |      |       |   |   |      |      |    |       |    |      |    |      | 0.77  | 0.32 |      | 12.27 | 0.56  | 0.42  |       |      | 0.52 |      |
| M-74(1)      | I     | 81.66 | 1.44 |      |      |       |   |   |      |      |    |       |    |      |    |      | 8.00  | 0.38 | 0.21 | 5.84  | 0.68  | 0.59  |       | 0.17 | 0.79 | 0.24 |
| M-77(1)      | I     | 89.27 | 1.37 |      |      |       |   |   |      |      |    |       |    |      |    |      | 3.92  | 0.55 | 0.41 | 2.46  | 1.24  | 0.78  |       |      |      |      |
| M-77(3)      | S     | 49.20 |      |      |      |       |   |   |      |      |    |       |    |      |    |      | 5.17  |      | 3.01 | 16.35 | 14.24 | 3.37  |       |      | 8.66 |      |
| M-80(1)      | I     | 79.19 | 0.83 |      |      |       |   |   |      |      |    |       |    |      |    |      | 12.58 | 0.61 | 0.14 | 3.10  | 0.68  | 2.37  |       | 0.16 | 0.34 |      |
| M-86(1)      | I     | 70.32 | 0.86 |      |      |       |   |   |      |      |    |       |    |      |    |      | 2.90  | 0.82 | 2.70 | 14.35 | 1.77  | 1.71  | 0.59  | 0.28 | 3.22 | 0.48 |
| M-89(2)      | I     | 64.24 | 0.44 |      |      |       |   |   | 2.19 |      |    |       |    |      |    |      | 3.54  | 1.12 | 0.54 | 12.76 | 3.63  | 6.96  | 1.40  | 0.23 | 1.57 | 1.38 |
| M-89(3)      | I     | 67.03 | 0.77 |      |      |       |   |   |      |      |    |       |    |      |    |      | 2.56  | 0.85 | 0.44 | 15.9  | 3.04  | 5.16  | 1.42  | 0.20 | 1.20 | 1.43 |
| M-89(5)      | I     | 69.34 | 0.87 |      |      | 2.14  |   |   | 1.38 |      |    |       |    |      |    |      | 2.84  | 1.07 | 0.52 | 3.90  | 2.30  | 10.61 | 1.10  | 0.24 | 0.96 | 2.73 |
| M-90(1)      | I     | 67.43 |      |      |      |       |   |   |      |      |    |       |    |      |    |      | 3.02  | 1.05 |      | 15.26 | 2.75  | 8.08  |       |      | 2.41 |      |
| M-90(2)      | I     | 72.99 |      |      |      |       |   |   | 2.23 |      |    |       |    |      |    |      | 3.33  | 1.07 |      | 11.67 | 3.47  | 0.53  | 0.97  |      | 3.74 |      |
| M-93(1)      | I     | 76.21 | 1.21 |      |      |       |   |   |      |      |    |       |    | 1.50 |    |      | 4.70  |      |      | 10.49 | 2.08  | 0.58  | 0.66  |      | 2.57 |      |

|          |   |       |      |      |  |      |      |  |      |      |      |  |  |      |  |      |       |      |      |       |       |       |      |      |       |      |
|----------|---|-------|------|------|--|------|------|--|------|------|------|--|--|------|--|------|-------|------|------|-------|-------|-------|------|------|-------|------|
| M-94(1)  | I | 71.37 | 0.59 |      |  |      |      |  | 3.53 | 0.05 | 1.65 |  |  |      |  |      | 4.04  | 0.51 |      | 11.51 | 2.45  | 0.14  | 0.94 |      | 2.74  | 0.48 |
| M-103(2) | S | 77.57 | 0.83 |      |  |      |      |  |      |      |      |  |  |      |  |      | 5.05  | 1.93 |      | 10.32 | 0.41  | 1.19  | 1.45 | 0.16 | 0.89  | 0.20 |
| M-103(3) | I | 74.01 | 1.21 | 0.16 |  |      |      |  |      |      |      |  |  | 1.96 |  |      | 7.70  | 2.27 |      | 5.23  | 1.65  | 2.76  | 2.02 | 0.53 |       | 0.50 |
| M-103(4) | I | 22.44 |      |      |  |      |      |  |      |      |      |  |  |      |  |      | 28.21 | 2.93 |      | 14.62 | 7.16  | 17.02 | 3.03 | 1.58 | 0.62  | 2.39 |
| M-103(5) | S | 18.15 |      |      |  | 1.02 |      |  |      |      |      |  |  |      |  | 0.81 | 41.68 | 2.96 |      | 8.37  | 6.81  | 11.59 | 3.16 | 1.43 | 0.84  | 3.18 |
| M-104(1) | I | 70.14 | 0.69 |      |  |      |      |  |      |      |      |  |  | 3.29 |  |      | 3.50  | 0.53 |      | 13.52 | 2.64  | 1.56  | 2.29 | 0.23 | 0.83  | 0.78 |
| M-104(2) | I | 68.05 | 0.49 |      |  |      |      |  |      |      |      |  |  | 3.16 |  |      | 3.82  | 0.52 |      | 16.51 | 2.58  | 1.49  | 2.77 | 0.24 |       | 0.37 |
| M-106(2) | I | 79.15 |      | 0.70 |  |      |      |  |      |      |      |  |  | 2.68 |  |      | 8.34  | 4.50 |      | 0.10  | 1.23  | 1.01  | 0.72 | 1.67 |       |      |
| M-117(1) | I | 43.98 |      |      |  |      |      |  |      |      |      |  |  |      |  |      | 6.46  | 1.79 |      | 0.10  | 40.11 | 5.71  | 0.73 | 0.27 | 0.95  |      |
| M-117(2) | I | 43.98 |      |      |  |      |      |  |      |      |      |  |  |      |  |      | 6.46  | 1.79 |      | 0.10  | 40.11 | 5.71  | 0.73 | 0.27 | 0.95  |      |
| M-117(3) | I | 33.02 | 0.42 |      |  |      |      |  |      |      |      |  |  | 0.58 |  | 0.06 | 16.58 | 3.78 |      | 21.97 | 1.74  | 18.29 | 2.33 | 0.41 | 0.82  |      |
| M-117(6) | I | 2.32  |      |      |  |      |      |  |      |      |      |  |  |      |  | 0.42 | 24.41 | 5.55 |      | 29.44 | 1.02  | 31.62 | 4.01 | 0.61 | 0.60  |      |
| M-117(7) | I | 82.39 | 0.63 |      |  |      |      |  |      |      |      |  |  |      |  |      | 4.52  | 0.70 |      | 6.73  | 1.35  | 1.72  | 0.72 |      | 1.00  | 0.24 |
| M-118(2) | S | 79.66 |      |      |  |      |      |  |      |      |      |  |  |      |  |      | 1.27  | 0.45 |      | 13.9  | 1.07  | 0.96  |      |      | 2.69  |      |
| M-118(3) | S | 79.16 |      |      |  |      |      |  |      |      |      |  |  |      |  |      | 1.71  | 0.49 |      | 12.52 | 2.01  | 1.59  |      |      | 2.52  |      |
| M-118(4) | I | 75.20 | 0.81 | 4.28 |  |      | 0.17 |  | 2.45 |      |      |  |  |      |  |      | 4.95  | 2.81 |      | 3.02  | 1.81  | 1.18  | 2.76 | 0.28 |       | 0.28 |
| M-118(5) | I | 81.93 |      | 1.59 |  |      |      |  | 2.94 |      |      |  |  |      |  |      | 4.69  | 1.79 |      | 0.10  | 2.61  | 1.38  | 2.72 |      |       | 0.35 |
| M-122(1) | I | 80.68 |      |      |  |      |      |  |      |      |      |  |  |      |  |      | 8.18  | 1.59 |      | 6.13  | 0.69  | 0.86  | 0.23 | 0.40 | 1.09  | 0.15 |
| M-122(2) | I | 45.09 |      |      |  |      |      |  |      |      |      |  |  |      |  |      | 5.98  |      | 2.92 | 0.10  | 24.14 |       |      |      | 21.87 |      |
| M-122(3) | I | 66.84 |      |      |  |      |      |  |      |      |      |  |  |      |  |      | 4.71  |      | 1.84 | 0.10  | 11.58 |       |      |      | 15.03 |      |
| M-123(1) | I | 92.04 | 0.62 |      |  |      |      |  |      |      |      |  |  |      |  |      | 3.10  | 0.91 | 0.20 | 2.25  | 0.22  | 0.41  | 0.25 |      |       |      |
| M-125(1) | I | 83.24 | 0.96 |      |  |      |      |  |      |      |      |  |  |      |  |      | 7.37  | 0.30 |      | 7.27  | 0.24  | 0.40  |      |      |       | 0.22 |
| M-125(2) | I | 79.89 | 1    |      |  | 0.05 |      |  |      |      |      |  |  |      |  |      | 8.12  | 0.34 |      | 7.73  | 0.57  | 1.44  | 0.21 | 0.15 |       | 0.50 |
| M-125(3) | I | 75.28 | 0.64 |      |  | 0.74 |      |  |      |      |      |  |  |      |  |      | 11.47 | 0.43 | 0.16 | 9.53  | 0.54  | 0.59  | 0.21 |      |       | 0.41 |
| M-125(4) | I | 71.81 | 0.71 |      |  | 0.72 |      |  |      |      |      |  |  |      |  |      | 11.5  | 0.38 |      | 11.56 | 0.6   | 0.80  | 0.35 |      | 0.54  | 1.03 |
| M-132(1) | I | 74.21 | 0.68 |      |  | 3.93 |      |  | 3.33 |      |      |  |  |      |  |      | 1.68  | 0.30 |      | 1.88  | 6.42  | 7.57  |      |      |       |      |
| M-132(2) | I | 70.81 | 0.51 |      |  |      |      |  |      |      |      |  |  | 1.52 |  |      | 3.38  | 0.59 |      | 19.31 | 2.00  | 1.22  |      |      |       | 0.66 |
| M-132(3) | I | 80.17 |      |      |  |      |      |  |      |      |      |  |  |      |  |      | 0.33  |      |      | 15.28 | 2.22  | 2.00  |      |      |       |      |
| M-132(5) | I | 76.27 |      |      |  |      |      |  |      |      |      |  |  | 0.79 |  |      | 3.77  | 0.64 |      | 13.17 | 2.40  | 1.61  | 0.65 |      |       | 0.70 |
| M-135(2) | I | 60.64 | 0.47 |      |  |      |      |  | 1.66 |      |      |  |  | 0.99 |  |      | 15.48 | 3.85 |      | 11.04 | 1.85  | 2.01  | 0.95 | 0.50 |       | 0.56 |
| M-135(3) | I | 63.08 | 0.48 |      |  | 5.21 |      |  |      |      |      |  |  |      |  |      | 15.59 | 0.90 |      | 8.44  | 1.80  | 2.77  | 0.12 | 0.28 |       | 1.33 |
| M-136(2) | I | 63.16 |      |      |  |      |      |  | 0.61 |      |      |  |  | 4.82 |  |      | 7.05  | 2.62 |      | 14.2  | 3.44  | 1.11  | 0.76 | 0.61 | 1.62  |      |
| M-136(4) | S | 90.94 |      |      |  |      |      |  |      |      |      |  |  |      |  |      | 1.02  | 0.28 |      | 7.41  | 0.19  | 0.16  |      |      |       |      |
| M-136(7) | I | 85.20 |      |      |  |      |      |  |      |      |      |  |  |      |  |      | 1.79  | 0.54 |      | 9.78  | 1.22  | 0.34  |      |      | 1.13  |      |
| M-138(2) | I | 76.51 | 0.67 |      |  |      |      |  | 0.51 |      |      |  |  |      |  |      | 5.18  | 0.74 | 0.26 | 8.11  | 1.60  | 3.41  | 0.68 |      | 0.90  | 1.43 |
| M-138(4) | I | 52.05 |      |      |  |      |      |  |      |      |      |  |  | 3.90 |  |      | 6.96  | 1.18 | 0.61 | 25.21 | 3.29  | 2.55  | 1.07 | 0.31 | 1.35  | 1.52 |
| M-144(3) | I | 71.20 | 0.32 |      |  | 0.29 |      |  | 2.65 |      |      |  |  |      |  |      | 3.69  | 1.58 | 0.31 | 12.46 | 3.71  | 2.29  | 1.50 |      |       |      |
| M-144(4) | I | 73.44 |      |      |  |      |      |  |      |      |      |  |  |      |  |      | 3.84  | 1.09 | 0.35 | 11.99 | 2.98  | 2.86  | 0.70 |      | 2.75  |      |
| M-147(2) | I | 52.63 |      | 0.43 |  | 0.88 |      |  |      |      |      |  |  | 1.56 |  |      | 15.12 | 7.70 |      | 16.99 | 1.67  | 0.55  | 1.46 | 1.01 |       |      |
| M-149(2) | I | 72.77 |      | 0.90 |  |      |      |  | 3.90 |      |      |  |  | 0.84 |  |      | 9.41  | 0.79 |      | 8.21  | 2.31  | 0.61  |      |      |       | 0.26 |
| M-149(3) | I | 88.37 | 0.57 |      |  |      |      |  | 0.97 |      |      |  |  |      |  |      | 2.90  | 0.41 |      | 4.16  | 0.84  | 0.70  |      |      | 0.52  | 0.56 |
| M-155(4) | I | 89.98 |      |      |  | 1.57 |      |  |      |      |      |  |  |      |  |      | 0.63  |      |      | 7.82  |       |       |      |      |       |      |

| <1 μm        |       |       |      |       |      |       |   |   |      |    |    |       |       |      |       |      |       |      |      |       |       |      |      |      |       |       |
|--------------|-------|-------|------|-------|------|-------|---|---|------|----|----|-------|-------|------|-------|------|-------|------|------|-------|-------|------|------|------|-------|-------|
| Analysis no. | shape | Fe    | Mn   | Cr    | Ni   | Zn    | V | W | Cu   | Sn | Sb | Pb    | Au    | Ba   | Zr    | Ti   | Si    | Al.  | P    | O     | S     | Ca   | Mg   | K    | Na    | Cl    |
| M-17(2)      | S     | 38.69 | 0.56 |       |      |       |   |   |      |    |    |       |       |      |       |      | 16.89 | 7.22 |      | 29.93 | 1.39  | 2.98 | 0.90 | 0.88 |       | 0.56  |
| M-17(4)      | S     | 38.67 | 0.28 |       |      | 2.05  |   |   | 0.13 |    |    |       |       |      |       | 0.12 | 17.98 | 6.99 |      | 26.76 | 1.83  | 3.35 | 0.73 | 0.74 |       | 0.37  |
| M-21(3)      | I     | 80.05 |      |       |      | 1.67  |   |   | 1.48 |    |    |       |       |      |       |      | 1.45  |      |      | 8.88  | 2.44  |      |      |      | 4.03  |       |
| M-21(4)      | S     | 62.52 |      |       |      |       |   |   |      |    |    |       |       |      |       |      | 7.64  | 5.52 |      | 16.93 | 1.66  | 0.58 | 2.92 | 0.44 | 1.80  |       |
| M-24(1)      | S     | 74.42 |      |       |      |       |   |   |      |    |    |       |       |      |       |      | 1.30  |      |      | 12.48 | 5.42  |      |      |      | 6.38  |       |
| M-24(2)      | S     | 47.07 |      |       |      |       |   |   |      |    |    |       |       |      |       |      | 4.83  |      |      | 12.63 | 23.00 |      |      |      | 12.47 |       |
| M-25(1)      | S     | 62.06 |      |       |      | 3.95  |   |   |      |    |    |       |       |      |       |      | 2.83  |      |      | 17.29 | 6.29  |      |      |      | 7.58  |       |
| M-25(2)      | S     | 46.52 |      |       |      |       |   |   |      |    |    |       |       |      |       |      | 5.84  |      |      | 19.89 | 13.06 |      |      |      | 14.69 |       |
| M-37(1)      | I     | 64.71 |      |       |      |       |   |   | 2.71 |    |    |       |       |      |       |      | 6.24  | 2.64 | 0.70 | 10.76 | 4.82  | 1.19 | 2.46 |      | 2.92  | 0.85  |
| M-38(1)      | I     | 55.92 | 0.98 |       |      |       |   |   | 1.77 |    |    |       |       |      |       |      | 6.86  | 4.10 | 0.71 | 21.35 | 2.37  | 0.84 |      |      | 4.03  | 1.07  |
| M-38(2)      | I     | 51.08 | 0.90 | 0.14  |      |       |   |   | 2.78 |    |    |       |       |      |       |      | 8.11  | 5.53 | 1.33 | 12.38 | 5.45  | 1.53 | 0.96 |      | 8.53  | 1.28  |
| M-39(2)      | I     | 80.04 | 2.35 |       |      |       |   |   |      |    |    |       |       |      |       |      | 4.72  | 0.88 | 0.51 | 5.95  | 2.9   | 2.65 |      |      |       |       |
| M-39(3)      | I     | 73.42 | 1.31 |       |      |       |   |   |      |    |    |       |       |      |       | 0.43 | 5.19  | 0.82 | 0.93 | 7.99  | 4.49  | 1.96 |      |      | 3.46  |       |
| M-41(1)      | S     | 77.25 |      |       |      |       |   |   |      |    |    |       |       |      |       |      | 6.13  | 0.98 |      | 13.21 | 0.83  |      |      |      | 1.60  |       |
| M-42(2)      | I     | 75.24 |      | 0.98  |      |       |   |   |      |    |    |       |       | 0.94 |       |      | 2.60  | 0.68 |      | 10.81 | 3.71  | 0.77 |      |      | 4.27  |       |
| M-42(3)      | I     | 74.86 | 0.94 |       |      |       |   |   |      |    |    |       |       |      |       |      | 2.52  | 0.52 | 0.37 | 13.26 | 2.78  | 0.84 |      |      | 3.91  |       |
| M-42(4)      | I     | 70.15 |      |       |      |       |   |   |      |    |    |       |       |      |       |      | 3.18  | 0.76 | 0.71 | 13.68 | 4.70  | 0.81 |      |      | 6.01  |       |
| M-44(1)      | S     | 79.69 |      |       |      | 1.52  |   |   |      |    |    |       |       |      |       |      | 1.53  |      | 0.48 | 13.34 | 0.86  | 0.25 |      |      | 2.33  |       |
| M-45(1)      | I     |       |      |       |      |       |   |   |      |    |    |       |       |      | 73.08 |      |       |      |      | 21.41 | 3.64  |      |      |      | 1.87  |       |
| M-46(1)      | I     | 55.58 | 1.52 | 12.62 | 6.03 |       |   |   |      |    |    |       |       |      |       |      | 3.06  |      |      | 11.90 | 4.32  | 0.31 |      |      | 4.66  |       |
| M-48(1)      | I     |       |      |       |      |       |   |   |      |    |    |       | 85.71 |      |       |      | 4.05  |      |      | 0.10  |       |      |      |      | 10.24 |       |
| M-57(1)      | S     | 77.97 |      |       |      |       |   |   |      |    |    |       |       |      |       |      | 1.87  |      | 0.32 | 17.13 | 0.62  | 0.67 |      |      | 1.42  |       |
| M-61(1)      | I     |       |      |       |      |       |   |   |      |    |    |       |       |      | 89.12 |      |       |      |      | 8.95  |       |      |      |      | 1.93  |       |
| M-65(1)      | I     | 50.28 | 1.31 | 14.3  | 7.68 |       |   |   |      |    |    |       |       |      |       |      | 5.23  |      |      | 17.20 | 1.75  | 0.74 |      |      | 1.51  |       |
| M-69(1)      | I     | 44.26 |      |       |      |       |   |   |      |    |    | 17.74 |       |      |       |      | 15.03 | 1.77 |      | 9.93  |       | 4.54 | 0.77 | 0.83 |       | 5.13  |
| M-69(2)      | I     | 10.42 |      |       |      |       |   |   |      |    |    | 34.97 |       |      |       |      | 16.04 | 0.96 |      | 19.47 |       | 4.13 | 0.43 | 0.32 |       | 13.26 |
| M-72(1)      | S     | 77.49 |      |       |      |       |   |   |      |    |    |       |       |      |       |      | 3.48  | 0.59 |      | 14.56 | 0.98  | 0.51 | 0.61 |      | 1.78  |       |
| M-72(3)      | I     | 73.07 |      |       |      |       |   |   |      |    |    |       |       |      |       |      | 1.30  | 0.52 |      | 17.76 | 0.70  | 5.24 | 0.71 |      | 0.70  |       |
| M-73(1)      | I     | 69.95 |      |       |      |       |   |   |      |    |    |       |       |      |       |      | 4.00  | 0.72 |      | 16.61 | 3.18  | 0.38 | 1.03 |      | 4.13  |       |
| M-73(2)      | I     | 70.28 |      |       |      |       |   |   |      |    |    |       |       |      |       |      | 5.93  | 0.63 | 0.70 | 14.21 | 3.87  | 0.43 |      |      | 3.95  |       |
| M-79(1)      | I     | 63.21 | 0.69 | 0.34  |      |       |   |   |      |    |    |       |       |      |       |      | 26.74 | 0.42 | 6.47 | 0.10  | 0.51  | 0.89 |      |      | 0.73  |       |
| M-79(3)      | I     | 54.56 | 0.70 |       |      |       |   |   |      |    |    |       |       |      |       |      | 33.94 | 0.27 |      | 7.24  | 0.63  | 1.54 | 0.34 |      | 0.66  | 0.12  |
| M-79(4)      | I     | 30.79 | 0.20 |       |      |       |   |   |      |    |    |       |       |      |       | 0.11 | 46.41 | 0.47 |      | 19.46 | 0.84  | 0.71 | 0.33 |      | 0.68  |       |
| M-86(2)      | I     | 49.91 |      |       |      |       |   |   |      |    |    |       |       |      |       |      | 3.94  |      | 2.52 | 20.27 | 11.28 | 2.20 |      |      | 9.88  |       |
| M-89(4)      | I     | 65.95 |      | 0.45  |      |       |   |   | 2.67 |    |    |       |       |      |       |      | 3.59  | 1.17 | 0.94 | 5.45  | 2.99  | 10.4 | 2.03 | 0.31 | 1.50  | 2.55  |
| M-93(2)      | I     | 49.63 |      |       |      |       |   |   |      |    |    |       |       |      |       |      | 24.99 |      | 0.93 | 14.43 | 4.70  | 1.28 |      |      | 4.04  |       |
| M-94(2)      | I     | 39.82 |      |       |      |       |   |   |      |    |    |       |       |      |       |      | 34.52 | 0.37 | 1.01 | 17.48 | 3.12  | 0.64 |      |      | 2.64  | 0.40  |
| M-94(3)      | I     | 71.21 | 0.76 |       |      |       |   |   |      |    |    |       |       |      |       |      | 15.83 |      |      | 5.28  | 3.15  |      |      |      | 3.77  |       |
| M-94(4)      | I     | 74.21 | 0.64 |       |      |       |   |   |      |    |    |       |       |      |       |      | 11.01 |      | 0.51 | 7.75  | 2.71  | 0.45 |      |      | 2.72  |       |
| M-96(1)      | S     | 64.02 | 2.57 |       |      | 6.63  |   |   |      |    |    |       |       |      |       |      | 2.75  |      | 1.17 | 16.84 | 3.81  | 2.21 |      |      |       |       |
| M-99(1)      | S     | 63.33 | 1.99 |       |      | 10.57 |   |   |      |    |    |       |       |      |       |      | 2.20  |      | 0.84 | 15.42 | 3.83  | 1.82 |      |      |       |       |
| M-99(2)      | S     | 65.00 | 1.89 |       |      | 13.97 |   |   |      |    |    |       |       |      |       |      | 1.58  |      | 0.87 | 12.50 | 2.74  | 1.45 |      |      |       |       |

|          |   |       |       |       |  |       |  |      |  |  |  |  |      |      |  |       |      |      |       |       |       |      |      |      |      |
|----------|---|-------|-------|-------|--|-------|--|------|--|--|--|--|------|------|--|-------|------|------|-------|-------|-------|------|------|------|------|
| M-99(3)  | S | 65.44 | 1.11  |       |  | 9.68  |  |      |  |  |  |  |      |      |  | 2.25  |      | 1.31 | 15.24 | 3.47  | 1.50  |      |      |      |      |
| M-99(4)  | S | 65.19 | 1.55  |       |  | 8.27  |  |      |  |  |  |  |      |      |  | 2.08  |      | 1.12 | 15.29 | 4.01  | 2.49  |      |      |      |      |
| M-100(1) | S | 78.13 |       |       |  |       |  |      |  |  |  |  |      |      |  | 0.83  |      |      | 13.51 | 2.88  |       |      |      | 4.65 |      |
| M-101(1) | S | 74.8  | 2.32  |       |  |       |  |      |  |  |  |  |      |      |  | 0.87  |      |      | 13.52 | 2.82  | 0.29  |      |      | 5.38 |      |
| M-101(2) | S | 69.19 | 2.71  |       |  | 3.03  |  |      |  |  |  |  |      |      |  | 0.92  |      | 0.35 | 13.25 | 3.33  | 0.34  | 0.75 |      | 6.13 |      |
| M-101(3) | S | 67.78 | 2.40  |       |  |       |  |      |  |  |  |  |      |      |  | 1.75  |      | 0.88 | 12.87 | 4.83  |       |      |      | 9.49 |      |
| M-106(1) | S | 71.33 |       |       |  |       |  |      |  |  |  |  |      |      |  | 6.29  | 3.94 |      | 10.64 | 6.43  | 0.57  |      | 0.80 |      |      |
| M-108(1) | I | 51.89 | 0.52  |       |  |       |  |      |  |  |  |  |      |      |  | 30.59 |      |      | 13.41 | 0.40  | 1.89  |      |      | 0.44 | 0.86 |
| M-108(2) | I | 65.75 | 0.87  |       |  |       |  |      |  |  |  |  |      |      |  | 21.47 | 0.24 |      | 8.38  | 0.23  | 2.03  |      |      |      | 1.03 |
| M-108(3) | I | 56.38 |       |       |  |       |  |      |  |  |  |  |      |      |  | 22.12 | 0.19 |      | 15.75 |       | 1.73  |      | 0.25 |      | 3.58 |
| M-109(1) | I | 68.63 |       |       |  |       |  |      |  |  |  |  |      |      |  | 3.59  |      |      | 18.03 | 4.21  | 1.53  |      |      | 4.01 |      |
| M-110(1) | S | 60.04 |       |       |  | 14.66 |  |      |  |  |  |  |      |      |  | 3.23  | 1.58 |      | 16.27 | 3.40  | 0.82  |      |      |      |      |
| M-110(2) | S | 62.96 |       |       |  | 3.59  |  |      |  |  |  |  |      |      |  | 3.13  | 0.90 |      | 17.95 | 3.78  | 1.17  |      |      | 6.52 |      |
| M-110(3) | S | 59.38 | 1.35  |       |  | 4.41  |  |      |  |  |  |  |      |      |  | 3.75  | 1.47 |      | 18.24 | 4.93  | 1.40  |      |      | 5.07 |      |
| M-110(4) | S | 60.19 |       |       |  | 11.67 |  |      |  |  |  |  |      |      |  | 3.85  | 1.74 |      | 17.53 | 4.04  | 0.98  |      |      |      |      |
| M-110(5) | S | 49.16 |       |       |  | 12.66 |  |      |  |  |  |  |      |      |  | 4.03  | 3.94 |      | 19.95 | 6.92  | 3.34  |      |      |      |      |
| M-111(1) | S | 60.6  |       |       |  | 7.83  |  |      |  |  |  |  |      |      |  | 4.07  | 2.35 |      | 20.02 | 3.78  | 1.35  |      |      |      |      |
| M-111(2) | S | 55.72 |       |       |  | 8.42  |  |      |  |  |  |  |      |      |  | 5.37  | 1.3  |      | 22.44 | 5.56  | 1.19  |      |      |      |      |
| M-111(3) | S | 53.48 |       |       |  | 12.10 |  |      |  |  |  |  |      |      |  | 5.51  | 1.55 |      | 20.20 | 5.20  | 1.96  |      |      |      |      |
| M-111(4) | S | 55.8  |       |       |  | 8.75  |  |      |  |  |  |  |      |      |  | 6.30  | 1.75 |      | 19.77 | 6.19  | 1.44  |      |      |      |      |
| M-111(5) | S | 44.27 |       |       |  | 3.69  |  |      |  |  |  |  |      |      |  | 6.03  | 1.80 | 1.38 | 21.31 | 9.90  | 2.50  |      |      | 9.12 |      |
| M-113(1) | S | 82.44 |       |       |  |       |  |      |  |  |  |  |      |      |  | 0.78  |      |      | 12.09 | 1.72  |       |      |      | 2.97 |      |
| M-114(1) | I | 73.27 | 0.89  |       |  |       |  |      |  |  |  |  |      |      |  | 3.19  | 0.58 |      | 14.89 | 2.81  | 1.83  |      |      | 2.54 |      |
| M-115(2) | I | 66.61 |       |       |  |       |  |      |  |  |  |  | 2.60 |      |  | 4.53  |      |      | 15.82 | 10.44 |       |      |      |      |      |
| M-117(4) | I | 25.01 | 0.29  |       |  |       |  |      |  |  |  |  | 0.63 |      |  | 15.68 | 4.64 |      | 23.43 | 10.78 | 14.26 | 2.39 | 0.63 | 1.76 | 0.50 |
| M-117(5) | I | 17.5  |       |       |  |       |  |      |  |  |  |  |      | 0.57 |  | 23.23 | 4.96 |      | 20.70 | 1.71  | 27.03 | 3.25 | 0.44 | 0.61 |      |
| M-117(8) | I | 60.49 | 0.63  |       |  |       |  |      |  |  |  |  | 0.83 |      |  | 11.81 | 2.63 |      | 11.54 | 1.47  | 6.92  | 2.03 | 0.25 | 1.23 | 0.17 |
| M-117(9) | I | 40.22 | 0.45  |       |  |       |  |      |  |  |  |  | 1.03 |      |  | 14.98 | 3.36 |      | 21.19 | 1.60  | 13.07 | 2.30 | 0.44 | 1.20 | 0.16 |
| M-119(1) | S | 61.41 | 11.02 | 7.45  |  |       |  |      |  |  |  |  |      |      |  | 6.03  | 3.59 |      | 4.29  | 2.85  | 1.73  | 0.96 | 0.67 |      |      |
| M-119(2) | S | 63.56 | 5.31  | 10.73 |  |       |  |      |  |  |  |  |      |      |  | 5.40  | 4.25 | 0.42 | 3.98  | 2.62  | 1.66  | 1.45 | 0.62 |      |      |
| M-119(3) | S | 59.26 |       | 8.98  |  | 7.61  |  |      |  |  |  |  |      |      |  | 6.69  | 4.40 | 0.42 | 5.56  | 2.70  | 2.13  | 1.32 | 0.93 |      |      |
| M-119(4) | S | 55.15 |       | 8.83  |  | 9.12  |  |      |  |  |  |  |      |      |  | 7.97  | 4.99 |      | 6.86  | 2.59  | 2.27  | 1.30 | 0.92 |      |      |
| M-120(1) | I | 73.79 |       | 0.69  |  |       |  | 1.68 |  |  |  |  |      |      |  | 5.09  | 2.06 |      | 10.52 | 2.93  | 1.47  | 1.77 |      |      |      |
| M-120(2) | I | 53.8  |       |       |  |       |  | 1.77 |  |  |  |  |      |      |  | 9.81  | 3.82 | 0.85 | 12.75 | 5.11  | 3.48  | 5.09 |      | 3.52 |      |
| M-120(3) | I | 61.54 |       | 1.13  |  |       |  | 1.69 |  |  |  |  |      |      |  | 13.43 | 6.11 | 0.77 | 0.10  | 6.07  | 2.80  | 5.73 | 0.73 |      |      |
| M-120(4) | I | 76.32 |       | 0.73  |  |       |  | 2.25 |  |  |  |  |      |      |  | 4.96  | 1.36 |      | 7.91  | 2.97  | 2.34  | 1.16 |      |      |      |
| M-120(5) | I | 70.95 |       | 1.14  |  |       |  | 2.18 |  |  |  |  |      |      |  | 4.86  | 1.39 | 0.45 | 9.14  | 2.98  | 1.91  | 2.18 |      | 2.82 |      |
| M-128(1) | S | 53.21 |       |       |  | 27.81 |  |      |  |  |  |  |      |      |  | 2.46  |      |      | 13.22 | 3.30  |       |      |      |      |      |
| M-128(3) | S | 75.43 |       |       |  |       |  |      |  |  |  |  |      |      |  | 1.99  |      |      | 12.66 | 3.68  | 0.43  |      |      | 5.81 |      |
| M-128(4) | S | 63.58 |       |       |  | 14.15 |  |      |  |  |  |  |      |      |  | 4.97  |      |      | 11.97 | 5.33  |       |      |      |      |      |
| M-128(5) | S | 81.94 | 0.93  |       |  |       |  |      |  |  |  |  |      |      |  | 1.00  |      |      | 11.87 | 1.28  |       |      |      | 2.98 |      |
| M-129(1) | S | 67.09 |       |       |  | 6.43  |  |      |  |  |  |  |      |      |  | 3.76  |      |      | 15.65 | 6.03  | 1.04  |      |      |      |      |
| M-129(2) | S | 71.13 |       |       |  | 6.06  |  |      |  |  |  |  |      |      |  | 2.89  |      |      | 14.77 | 5.15  |       |      |      |      |      |
| M-129(3) | S | 69.48 |       |       |  | 6.14  |  |      |  |  |  |  |      |      |  | 3.01  |      |      | 16.31 | 5.06  |       |      |      |      |      |
| M-129(4) | S | 65.62 |       |       |  | 6.28  |  |      |  |  |  |  |      |      |  | 2.14  |      |      | 14.49 | 4.45  |       |      |      | 7.02 |      |

|          |   |       |      |  |  |      |  |  |  |  |  |  |  |  |  |  |       |       |      |       |       |       |      |       |      |      |
|----------|---|-------|------|--|--|------|--|--|--|--|--|--|--|--|--|--|-------|-------|------|-------|-------|-------|------|-------|------|------|
| M-130(2) | S | 65.06 |      |  |  | 8.29 |  |  |  |  |  |  |  |  |  |  | 3.80  |       |      | 6.95  | 6.98  |       |      |       | 8.92 |      |
| M-130(3) | S | 59.68 |      |  |  | 6.85 |  |  |  |  |  |  |  |  |  |  | 5.43  | 1.04  | 0.40 | 12.10 | 7.89  |       |      |       | 6.61 |      |
| M-136(1) | S | 83.13 | 0.53 |  |  |      |  |  |  |  |  |  |  |  |  |  | 1.92  | 1.59  |      | 11.64 | 0.89  | 0.30  |      |       |      |      |
| M-141(1) | I | 53.82 |      |  |  |      |  |  |  |  |  |  |  |  |  |  | 3.43  | 1.31  |      | 23.88 | 7.43  | 3.42  |      |       | 5.15 | 1.56 |
| M-141(2) | I | 57.62 |      |  |  |      |  |  |  |  |  |  |  |  |  |  | 2.66  | 1.15  |      | 20.26 | 5.78  | 3.19  |      |       | 7.80 | 1.54 |
| M-142(2) | I | 22.29 |      |  |  |      |  |  |  |  |  |  |  |  |  |  | 36.97 | 11.44 |      | 0.10  | 8.60  | 3.05  |      | 12.17 | 4.10 | 1.38 |
| M-142(3) | S | 48.44 |      |  |  | 6.77 |  |  |  |  |  |  |  |  |  |  | 4.67  | 1.99  |      | 19.87 | 6.52  | 7.21  | 1.69 | 0.47  |      | 2.37 |
| M-142(4) | S | 50.36 |      |  |  | 8.50 |  |  |  |  |  |  |  |  |  |  | 5.11  | 2.90  |      | 19.07 | 7.31  | 5.02  |      |       |      | 1.73 |
| M-142(5) | S | 52.39 |      |  |  | 6.16 |  |  |  |  |  |  |  |  |  |  | 6.55  | 2.62  |      | 0.10  | 11.48 | 5.69  | 2.28 |       | 9.44 | 3.39 |
| M-142(6) | I | 27.44 |      |  |  |      |  |  |  |  |  |  |  |  |  |  | 14.12 | 6.45  | 0.85 | 20.93 | 7.04  | 11.29 | 1.09 | 2.91  | 4.68 | 3.20 |
| M-144(2) | S | 80.83 |      |  |  |      |  |  |  |  |  |  |  |  |  |  | 2.53  | 0.84  |      | 13.26 | 1.16  | 0.97  | 0.19 | 0.22  |      |      |
| M-146(1) | I | 92.17 | 0.50 |  |  |      |  |  |  |  |  |  |  |  |  |  | 1.48  |       |      | 3.85  | 0.84  | 0.26  |      |       | 0.90 |      |
| M-146(2) | I | 88.47 |      |  |  | 0.28 |  |  |  |  |  |  |  |  |  |  | 2.24  | 0.64  |      | 5.12  | 2.73  | 0.52  |      |       |      |      |
| M-146(3) | S | 25.80 |      |  |  |      |  |  |  |  |  |  |  |  |  |  | 4.20  | 1.53  |      | 19.01 | 14.7  | 34.76 |      |       |      |      |
| M-146(4) | S | 92.63 | 1.57 |  |  |      |  |  |  |  |  |  |  |  |  |  | 1.61  | 0.58  |      | 0.87  | 1.28  | 1.46  |      |       |      |      |
| M-156(2) | S | 80.55 | 2.84 |  |  | 4.18 |  |  |  |  |  |  |  |  |  |  | 1.51  |       |      | 8.84  | 2.08  |       |      |       |      |      |
